# Supplementary material
Source: publisher figshare collection journal article supplement (https://frontiersin.figshare.com/ndownloader/files/28945977)
Supplement: Supplementary file 1 [file 28945977]

## Sheet: Sheet1
Table S3: Pair-wise posthoc tests for fixed term ‘Sediment Horizon’ and interaction of terms ‘Sediment Horizon x Topography’.
All 16 S microbial sediment assemblages			Putative carbon-fixing and nitrifying taxa			Nitrososphaeria taxa (Thaumarchaeota)
Comparison			Comparison			Comparison
Sediment Horizon	t	P	Sediment Horizon	t	P	Sediment Horizon	t	P
0-1 cm vs 1-2 cm	1.9176	0.001	0-1 cm vs 1-2 cm	1.7476	0.03	0-1 cm vs 1-2 cm	2.9343	0.002
0-1 cm vs 5-6 cm	2.2514	0.001	0-1 cm vs 5-6 cm	3.0346	0.001	0-1 cm vs 5-6 cm	3.7261	0.001
0-1 cm vs 10-12 cm	2.7428	0.001	0-1 cm vs 10-12 cm	3.4754	0.004	0-1 cm vs 10-12 cm	3.9221	0.001
0-1 cm vs 20-22 cm	3.6132	0.001	0-1 cm vs 20-22 cm	5.5264	0.001	0-1 cm vs 20-22 cm	5.2468	0.001
1-2 cm vs 5-6 cm	1.3565	0.04	1-2 cm vs 5-6 cm	1.5577	0.114	1-2 cm vs 5-6 cm	1.91	0.012
1-2 cm vs 10-12 cm	2.0021	0.001	1-2 cm vs 10-12 cm	3.0641	0.006	1-2 cm vs 10-12 cm	2.7454	0.001
1-2 cm vs 20-22 cm	2.8739	0.001	1-2 cm vs 20-22 cm	4.9146	0.001	1-2 cm vs 20-22 cm	4.7888	0.001
5-6 cm vs 10-12 cm	1.6357	0.002	5-6 cm vs 10-12 cm	2.2046	0.024	5-6 cm vs 10-12 cm	3.0359	0.001
5-6 cm vs 20-22 cm	2.5187	0.001	5-6 cm vs 20-22 cm	4.2743	0.001	5-6 cm vs 20-22 cm	4.3469	0.001
10-12 cm vs 20-22 cm	1.6815	0.004	10-12 cm vs 20-22 cm	3.2685	0.007	10-12 cm vs 20-22 cm	2.6297	0.002
